# Supplementary material for: Frames and Counter-Frames Giving Meaning to Palliative Care and Euthanasia in the Netherlands
Source: Research Square preprint supplement (doi:10.21203/rs.3.rs-112118/v1), 2020-12-02
Supplement: Supplementary file 1 [file bb20aa612236021512aaa474.docx]

**Frames and counter-frames giving meaning to palliative care and euthanasia in the Netherlands**

Baldwin Van Gorp1 (*)

Gert Olthuis2

Anneleen Vandekeybus1

Jelle van Gurp2

1Institute for Media Studies

KU Leuven

Parkstraat 45 box 3603

3000 Leuven

Belgium

2Radboud University Medical Center

PO Box 9101

6500 HB Nijmegen

The Netherlands

(*) correspondence to [baldwin.vangorp@kuleuven.be](mailto:baldwin.vangorp@kuleuven.be)

**Annex 1:** **A concise socio-cultural history of palliative care and euthanasia in the Netherlands**

The Dutch euthanasia practice [[1](#Gordijn), [2](#TenHave), [3](#Weyers)] gradually arose from a fading taboo of death and dying, as well as a critical stance towards medicine’s technological power during the 1960s in Dutch society. An increased openness to dying fitted a Dutch society which, at the time, was secularising rapidly and which, in general, had strong feelings regarding the value of candour [[3](#Weyers)]. It was the book of JH van den Berg, ‘Medical Power and Medical Ethics’ (1969, translated in 1978), that expressed a growing discomfort with physicians unsparingly applying medical technology to continue their patients’ lives [[1](#Gordijn)]. A patient’s life was still seen as valuable, but the medical interventions were subjected to the criterion of medical futility. Patients should obtain a bigger role in decision making, which is more concerned with their quality of life. Not only discussions about refraining from action arose, but also about the double effect that normal medical care can have when pain relief has the unintended side-effect of shortening life [[4](#GordijnJanssens2000)].

The 1970s produced a sample of exemplary law cases in which termination of life on request was discussed in court. The then committee of Procurators-General aimed to test the boundaries of the law and build a national prosecutorial policy [[3](#Weyers)]. At the same time, civil society joined the Dutch Society to support a Voluntary End-of-Life initiative. From these societal discussions emerged the conflict of duties (the *Force Majeure*) that was experienced by physicians: they have the duty to relieve the patient’s intolerable suffering, but, at the same time, must protect their lives [[1](#Gordijn), [5](#vanWijngaarden)]. The Dutch Medical Association, at that time, stated that physicians could be trusted to work carefully in cases of intolerable suffering and produced a professional standard on terminating life on request [[3](#Weyers)]. All this, along with solid research on the practice of terminating life on request formed the basis of a gradual transformation from a pragmatic tolerance of euthanasia into a legally codified practice [[1](#Gordijn)]. The latter was finally issued in 2002.

From 1975, palliative care slowly gained ground in the Netherlands, with noticeable initiatives in nursing homes and, from the 1990s, in specialised hospices [[6](#GordijnJanssens2004), [7](#Janssens)]. In contrast to other national networks, the Dutch network palliative care for terminal patients included euthanasia in the practice of palliative care [[4](#GordijnJanssens2000)]. Euthanasia has always been considered as a potentially worthy end whilst receiving palliative care, but high-standard palliative care has equally been considered a necessary precondition for a euthanasia practice that was not caused by insufficient and/or inadequate care [[1](#Gordijn)]. With substantial financial impulses from the government in 1996 and 2014, Dutch palliative care rapidly professionalised.

Almost two decades after legislation, and with a professionalised euthanasia and palliative care practice at hand, the Dutch society is still confronted with a few heavily debated issues. With the euthanasia practice originally being built on beneficence and compassion of physicians, there is a slow but steady shift towards autonomy and self-determination being the most important values [[8](#vanWijngaarden)]. This means that citizens increasingly claim the right to decide where and when they want to die. This resulted in a civil ‘Death with Dignity’ movement (the association “By Free Will”) which advocates for physician-assisted death for people over 70 years old who do not have a disease, but feel that ‘life is completed and no longer worth living’ [[8](#vanWijngaarden2015)]. As these elderly do not have a disease this issue lies beyond the euthanasia law, but the societal discussion however is closely related. What lies within the boundaries of the law is the discussion on the issue of (in)voluntariness, advanced directives, and euthanasia in dementia care [[9](#deBeaufort), [10](#Miller)], and the continuing discussion on the notion of ‘unbearable suffering’ that is central to the law [[11](#Dees)].

**References**

1. Gordijn B, Visser A. Issues in Dutch palliative care: Readjusting a distorted image. Patient Educ Couns. 2000;41(1):1-5. doi:10.1016/s0738-3991(00)00123-3
2. Ten Have J, Welie J. Death and medical power: an ethical analysis of Dutch euthanasia practice. Maidenhead: Open University Press; 2005.
3. Weyers H. Explaining the emergence of euthanasia law in the Netherlands: How the sociology of law can help the sociology of bioethics. Sociol Health Ill. 2006;28(6):802-816. doi:10.1111/j.1467-9566.2006.00543.x
4. Gordijn B, Janssens R. The prevention of euthanasia through palliative care: New developments in The Netherlands. Patient Educ Couns. 2000;41(1):35-46. doi:10.1016/s0738-3991(00)00113-0
5. van Wijngaarden E, Klink A, Leget C, The AM. Assisted dying for healthy older people: A step too far? BMJ. 2017;357:j2298. doi:10.1136/bmj.j2298
6. Gordijn B, Janssens R. Euthanasia and palliative care in The Netherlands: An analysis of the latest developments. Health Care Anal. 2004;12(3):195-207. doi:10.1023/B:HCAN.0000044926.05523.ef
7. Janssens RJ, ten Have HA. The concept of palliative care in The Netherlands. Palliative Med. 2001;15(6):481-486. doi:10.1191/026921601682553969
8. van Wijngaarden E, Leget C, Goossensen A. Ready to give up on life: The lived experience of elderly people who feel life is completed and no longer worth living. Soc Sci Med. 2015;138:257-264. doi:10.1016/j.socscimed.2015.05.015
9. de Beaufort ID, van de Vathorst S. Dementia and assisted suicide and euthanasia. J Neurol. 2016;263(7):1463-1467. doi:10.1007/s00415-016-8095-2
10. Miller DG, Dresser R, Kim SYH. Advance euthanasia directives: a controversial case and its ethical implications. J Med Ethics. 2019;45(2):84-89. doi:10.1136/medethics-2017-104644
11. Dees MK, Vernooij-Dassen MJ, Dekkers WJ, Vissers KC, van Weel C. 'Unbearable suffering': A qualitative study on the perspectives of patients who request assistance in dying. J Med Ethics. 2011;37(12):727-734. doi:10.1136/jme.2011.045492
